# Supplementary material
Source: PubMed Central journal article supplement (PMC8119373)
Supplement: NIHMS1698969-supplement-SI.pdf [file NIHMS1698969-supplement-SI.pdf]

## Supporting Information:

### Variable-Temperature-Electrospray Ionization for Temperature-Dependent Folding/Refolding Reactions of Proteins and Ligand Binding

Jacob W. McCabe<sup>1‡</sup>, Mehdi Shirzadeh<sup>1‡</sup>, Thomas E. Walker<sup>1</sup>, Cheng-Wei Lin<sup>1</sup>, Benjamin J. Jones<sup>2</sup>, Vicki H. Wysocki<sup>2</sup>, David P. Barondeau<sup>1</sup>, David E. Clemmer<sup>3</sup>, Arthur Laganowsky<sup>1</sup>, David H. Russell<sup>1\*</sup>

<sup>1</sup>Department of Chemistry, Texas A&M University, College Station Texas 77843

<sup>2</sup>Department of Chemistry, Ohio State University, Columbus, Ohio 43210

<sup>3</sup>Department of Chemistry, Indiana University, Bloomington, Indiana 47405

<sup>‡</sup> contributed equally as first authors

Correspondence to: [Russell@chem.tamu.edu](mailto:Russell@chem.tamu.edu)

## Table of Contents:

|                                                                                        |    |
|----------------------------------------------------------------------------------------|----|
| Expression and preparation of fraxtain.....                                            | S2 |
| Analysis of experimental data.....                                                     | S2 |
| Custom Power Supply Fabriaction .....                                                  | S2 |
| Figure S1: Wiring Schematic of the Peltier TEC Power Supply.....                       | S3 |
| Figure S2: CCS profile of 7 <sup>+</sup> A-state ubiquitin collected on Synapt G2..... | S3 |
| Figure S3: Temperature dependence MS of ATP binding to GroEL.....                      | S4 |
| Table S1: CCS peak information for Frataxin.....                                       | S4 |
| References.....                                                                        | S4 |

## Expression and preparation of fraxatin:

A *His<sub>6</sub>-GST-TEV-FXN* construct was generated by subcloning the FXN ( $\Delta 1-81$ ) gene into a pET-28a(+) vector containing *His<sub>6</sub>-GST-TEV-CyaY*<sup>1</sup> using the MEGAWHOP<sup>2</sup> protocol, and was transformed into the *E. coli* strain BL21(DE3) for expression. After growing at 37 °C to an OD<sub>600</sub> of 0.5, 0.1 mM isopropyl  $\beta$ -D-1-thiogalactopyranoside (IPTG) was added into the cell culture to induce protein expression at 18 °C. Cells were harvested by centrifugation the following morning, and stored in a -80 °C freezer until use. The cell pellet from a 3 L culture was thawed and resuspended in GST buffer A (50 mM Hepes, 150 mM NaCl, pH = 7.8). The cells were lysed by 2 cycles of French press at 18,500 psi, followed by centrifugation at 16,420 RCF for 30 min. The clarified lysate was loaded onto a manually packed GST-column (Prometheus) at 4 °C and bound proteins were eluted with GST buffer B (50 mM Hepes, 150 mM NaCl, 10 mM glutathione, pH = 7.8). The GST tag was cut by an overnight TEV digestion at 4 °C, and the products were loaded onto a Ni-NTA column (5 mL; GE Healthcare) to remove the TEV protease. The flow-through from the Ni-NTA column was concentrated to 20 mL, diluted to 150 mL with size exclusion buffer (50 mM Hepes, 250 mM NaCl, pH = 7.5), and loaded onto a HiPrep 26/60 Sephacryl S100 HR column. Fractions containing FXN were pooled, concentrated, frozen in liquid nitrogen, and stored at -80 °C until use. Concentration was determined using an extinction coefficient of 26,930 M<sup>-1</sup> cm<sup>-1</sup> at 280 nm as estimated by ExPASy ProtParam.

## Analysis of experimental data

MS data were collected at a determined heat exchanger temperature based on a solution temperature determined from prior calibration. The average charge state ( $Z_{avg}$ ) was calculated following the method of El-Baba et al.<sup>3</sup>,

$$Z_{avg} = \frac{\sum_j^n z_j i_j}{\sum_j^n i_j}$$

where  $Z_{avg}$  is the average charge state,  $j$  is a single temperature,  $i$  is the normalized intensity of the ion signal. To determine the melting temp ( $T_{melt}$ ), the inflection point was calculated by fitting the experimental data with a sigmoidal curve generated in SigmaPlot 10 using a sigmoid, 4 parameter fit,

$$Z_{avg}(T) = \frac{a}{1 + e^{-\left(\frac{T - T_{melt}}{b}\right)}}$$

where  $Z_{avg}$  is the average charge state and  $T_{melt}$  is the temperature of melting, and  $a$  and  $b$  are fitting parameters.

## Custom Power Supply Fabrication

The TEC controller and additional electronics are housed in a small aluminum enclosure (22.86 cm L x 17.78 cm W x 5.08 cm H). An AC/DC power supply (Meanwell LRS-100 24) provides 24 VDC to the TEC controller, 24 VDC fans, and the DC/DC converter (Texas Instruments PTN78020WAH). The DC/DC converter is mounted on a custom PCB, designed using EAGLE 9.6.2 (Autodesk), and fabricated by OSHPark (www.oshpark.com). The DC/DC converter steps down the 24V DC from the power supply to the max voltage of the TEC of 5.3V at 6A. The DC/DC converter allows for the TEC to operate at the optimal voltage and current to

quickly and efficiently change the temperature. In addition, the voltage output of the DC/DC converter can be changed by changing the resistance value if a different TEC is ever selected. The small footprint and preset output voltage allow users who are not familiar with the system to operate the VT-ESI device using included software safely and quickly with the TC-720 (TE Technology). A wiring schematic of the power supply can be found in **Figure S1**.

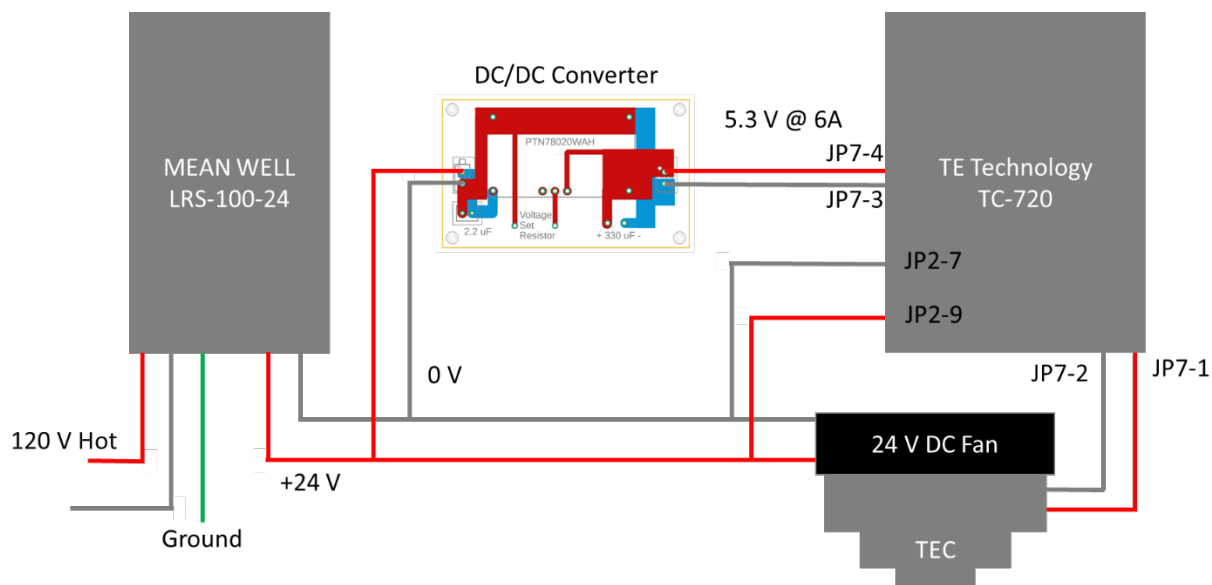

**Figure S1.** Wiring schematic of the Peltier TEC.

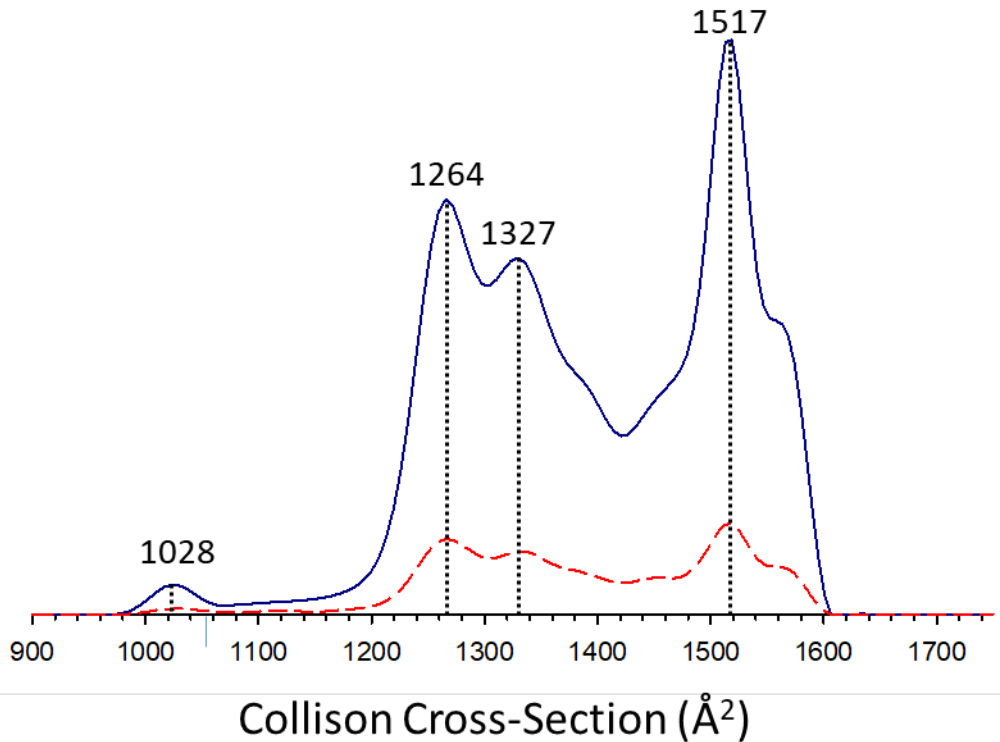

**Figure S2.** CCS profiles for the A state of ubiquitin from a 49:49:2 MeOH:H<sub>2</sub>O:acetic acid solution. Data acquired using the Waters SYNAPT G2 TWIMS and vT-ESI at 5 °C (blue) and 25 °C (red).<sup>4</sup>

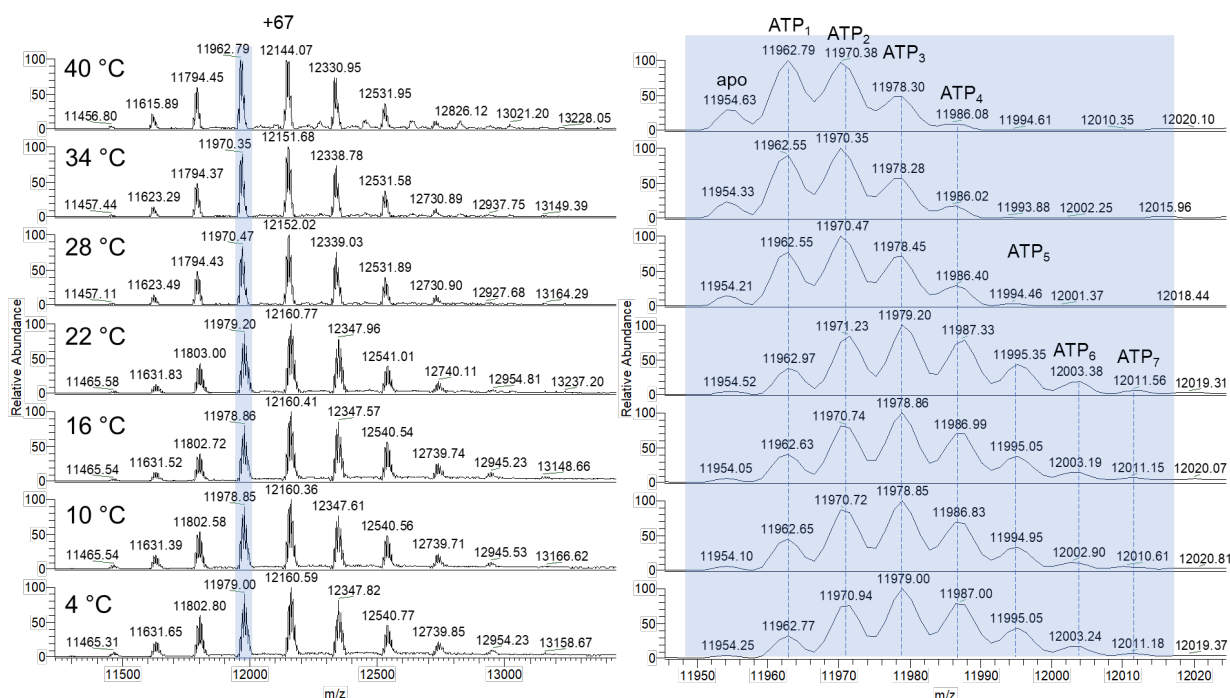

**Figure S3.** Temperature-dependent MS of 1  $\mu$ M GroEL with ATP (125  $\mu$ M) in 200 mM ammonium acetate.

| Temperature | Z (+) | Average CCS ( $\text{\AA}^2$ ) | Standard Deviation of CCS | FWHM | $R_{IM}$ |
|-------------|-------|--------------------------------|---------------------------|------|----------|
| 5 °C        | 6     | 1540                           | 8                         | 257  | 6.0      |
|             | 7     | 2160                           | 5                         | 176  | 12.3     |
| 37 °C       | 6     | 1520                           | 3                         | 220  | 6.9      |
|             | 7     | 2150                           | 4                         | 142  | 15.1     |
| 80 °C       | 6     | 1540                           | 10                        | 275  | 5.6      |
|             | 7     | 2160                           | 5                         | 180  | 12.0     |

**Table S1:** Calculated CCS values for acquisitions of FXN at 5 °C, 37 °C, and 80 °C with the peak fitting parameters ( $n=3$ ). Where  $R_{IM}$  is the  $CCS/\Delta CCS_{FWHM}$

## References:

- Bridwell-Rabb, J.; Iannuzzi, C.; Pastore, A.; Barondeau, D. P. Effector role reversal during evolution: the case of frataxin in Fe-S cluster biosynthesis. *Biochemistry* **2012**, *51* (12), 2506-14.
- Miyazaki, K. MEGAWHOP cloning: a method of creating random mutagenesis libraries via megaprimer PCR of whole plasmids. *Methods Enzymol.* **2011**, *498*, 399-406.

3. El-Baba, T. J.; Woodall, D. W.; Raab, S. A.; Fuller, D. R.; Laganowsky, A.; Russell, D. H.; Clemmer, D. E. Melting Proteins: Evidence for Multiple Stable Structures upon Thermal Denaturation of Native Ubiquitin from Ion Mobility Spectrometry-Mass Spectrometry Measurements. *J. Am. Chem. Soc.* **2017**, *139* (18), 6306-6309.
4. Ruotolo, B. T.; Benesch, J. L. P.; Sandercock, A. M.; Hyung, S.-J.; Robinson, C. V. Ion mobility–mass spectrometry analysis of large protein complexes. *Nat. Protoc.* **2008**, *3* (7), 1139-1152.
